# Supplementary material for: Transcriptional Dysregulation in NIPBL and Cohesin Mutant Human Cells
Source: PubMed Central journal article supplement (PMC2680332; doi:10.1371/journal.pbio.1000119), 2009-05-26
Supplement: pbio.1000119.s015.pdf [file pbio.1000119.s015.pdf]

Table S11. Specific primer pairs used for ChIP-qPCR validation. Primer pair #1 and #2 amplify regions that are bound by cohesin equally in healthy and CdLS cells, and served here as positive controls. Primer pair #3 and #4 amplify regions that are not bound by cohesin in either healthy or CdLS cells, and served as negative controls. Primer pair # 5 to # 13 amplify regions that were identified as having lost cohesin binding in CdLS cells by the qualitative ChIP array studies.

| Primer ID | left primer            | right primer              | Chr   | position            |
|-----------|------------------------|---------------------------|-------|---------------------|
| 1         | ACCACAAGGTGGCAGAATAAG  | CACATGCATATAGGCTAACGAAG   | chr3  | 79653256-79653385   |
| 2         | AACACAAGCGGTCTCTGTCC   | GATGGCTCTTCATGTACGG       | chr18 | 72239945-72240119   |
| 3         | GAGCTCTAAGGGAGGCTCCG   | CATCATGGTGTCTCACAGG       | chr11 | 1983833-1983994     |
| 4         | TGCCATGCGTTGAAAATATCC  | TGCTTTCTGAAGTTGCCAAGC     | chr7  | 27213317-27213491   |
| 5         | GGCACGATTACTTAATGTTACG | CTGCAGCAGTGGTCGC          | chr5  | 124071139-124071295 |
| 6         | ACTTGTTCTGGAAGGCTCTC   | TTGAGGAGACACCAGAGTGAC     | chr5  | 124088545-124088657 |
| 7         | ACGAGAGTGTGGCTCATGC    | AGGAAGGACGACTCATCTGG      | chr4  | 47187478-47187660   |
| 8         | AGTCCTTCTCCGCACCATC    | CCATTATCTTCACACCCATATCC   | chr13 | 112645175-112645323 |
| 9         | AGGAGATGCTGTGCTGATCC   | TATCCAGAGCGAGTGTGCTG      | chr1  | 153443443-153443596 |
| 10        | CCAGGCACTGTCTTCAAC     | TGTGTTGCATGTAATGTACTAGCTC | chr6  | 10586629-10586819   |
| 11        | GCCAAGCTAATGCACATGG    | CACAGCTCAAGAGCACCATC      | chr6  | 114422682-114422857 |
| 12        | TTCTCTTCAGTGCTCTTCAAC  | TTGCAAGCGTGTGGACTC        | chr16 | 71623997-71624129   |
| 13        | AGTGAGAGAGAGGTTACAGTCC | TGACACCATTGAGATGTTGACTC   | chr14 | 96721538-96721691   |

\*Primer #28 (negative for CTCF nd RAD21) Wendt KS. *et al.* Nature 2008 451 796

\*Primer #36 (negative for CTCF nd RAD21) Wendt KS. *et al.* Nature 2008 451 796
