# Supplementary material for: Transcriptional Dysregulation in NIPBL and Cohesin Mutant Human Cells
Source: PLoS Biol. 2009 May 26;7(5):e1000119. doi: 10.1371/journal.pbio.1000119 (PMC2680332; doi:10.1371/journal.pbio.1000119)
Supplement: Table S10 — Intragenic cohesin binding in mapped human RefSeq genes. The total number of mapped human RefSeq transcripts is 15,162, whereas 4,784 genes are not transcribed in LCLs (group A); 9,199 genes are transcribed but not differentially expressed in CdLS (group B); and 1,179 genes are both transcribed and differentially expressed in CdLS (group C). (A) Cohesin binding is reduced in group A genes (18.9% of 4,784 genes) but increased in group C genes (27.0% of 1,179 genes) as compared to all the mapped transcripts (22.0% of 15,162 genes). Group B genes demonstrate little change (22.9% of 9,199 genes) as compared to all mapped transcripts. In CdLS, the number of genes bound by cohesin in all the groups is significantly reduced (all transcripts, 22.0% → 16.0%; group A genes, 18.9% → 13.8%; group B genes, 22.9% → 16.8%; group C genes, 27.0% → 18.5%). (B) In both control and CdLS, when compared to the number of genes bound by cohesin in all the mapped transcripts (22.0% in control and 16.0% in CdLS), group A has a significantly reduced percentage of genes bound by cohesin (p≤7.2e−6 in control and p≤0.000187 in CdLS), whereas group C has a significantly increased percentage of genes bound by cohesin (p≤7.44e−5 in control and p≤0.0249 in CdLS), and group B does not demonstrate a statistically significant change in cohesin binding (p≤0.0864 in control and p≤0.0836 in CdLS). *p, binomial proportions comparing intragenic cohesin binding between control and CdLS; **p, binomial proportions comparing intragenic cohesin binding between individual group (A, B, or C) and all the mapped transcripts. (0.27 MB PDF) [file pbio.1000119.s014.pdf]

Table S10. Intragenic cohesin binding in mapped human RefSeq genes. The total number of mapped human RefSeq transcripts is 15,162, whereas 4,784 genes are not transcribed in LCLs (group A); 9,199 genes are transcribed but not differentially expressed in CdLS (group B); and 1,179 genes are both transcribed and differentially expressed in CdLS (group C). (A) Cohesin binding is reduced in group A genes (18.9% of 4,784 genes) but increased in group C genes (27.0% of 1,179 genes) as compared to all the mapped transcripts (22.0% of 15,162 genes). Group B genes demonstrate little change (22.9% of 9,199 genes) as compared to all mapped transcripts. In CdLS, the number of genes bound by cohesin in all the groups is significantly reduced (all transcripts: 22.0%  $\Rightarrow$  16.0%; Group A genes: 18.9%  $\Rightarrow$  13.8%; Group B genes: 22.9%  $\Rightarrow$  16.8%; group C genes: 27.0%  $\Rightarrow$  18.5%). (B) In both control and CdLS, when compared to the number of genes bound by cohesin in all the mapped transcripts (22.0% in control and 16.0% in CdLS), group A has a significantly reduced percentage of genes bound by cohesin ( $p \leq 7.2e-06$  in control and  $p \leq 0.000187$  in CdLS), whereas group C has a significantly increased percentage of genes bound by cohesin ( $p \leq 7.44e-05$  in control and  $p \leq 0.0249$  in CdLS) and group B does not demonstrate a statistically significant change in cohesin binding ( $p \leq 0.0864$  in control and  $p \leq 0.0836$  in CdLS). \* $p$ : binomial proportions comparing intragenic cohesin binding between control and CdLS; \*\* $p$ : binomial proportions comparing intragenic cohesin binding between individual group (A, B, or C) and all the mapped transcripts.

#### A

|                        | All mapped transcripts  | Group A genes (non-transcribed) | Group B genes (transcribed, neutral) | Group C gene (transcribed, disease specific) |
|------------------------|-------------------------|---------------------------------|--------------------------------------|----------------------------------------------|
| <b>Control</b>         | 22.0%<br>(3,333/15,162) | 18.9%<br>(906/4,784)            | 22.9%<br>(2,109/9,199)               | 27.0%<br>(318/1,179)                         |
| <b>CdLS</b>            | 16.0%<br>(2,425/15,162) | 13.8%<br>(658/4,784)            | 16.8%<br>(1,549/9,199)               | 18.5%<br>(218/1,179)                         |
| <b>*<math>p</math></b> | $\leq 2.58e-40$         | $\leq 7.11e-12$                 | $\leq 4.54e-25$                      | $\leq 8.95e-07$                              |

#### B

|                | All mapped transcripts | Group A genes (non-transcribed)  | Group B genes (transcribed, neutral) | Group C genes (transcribed, disease specific) |
|----------------|------------------------|----------------------------------|--------------------------------------|-----------------------------------------------|
| <b>Control</b> | 22.0%                  | 18.9%<br>(** $p \leq 7.2e-06$ )  | 22.9%<br>(** $p \leq 0.0864$ )       | 27.0%<br>(** $p \leq 7.44e-05$ )              |
| <b>CdLS</b>    | 16.0%                  | 13.8%<br>(** $p \leq 0.000187$ ) | 16.8%<br>(** $p \leq 0.0836$ )       | 18.5%<br>(** $p \leq 0.0249$ )                |
